1 **Title: R-spondins can potentiate WNT signaling without LGR receptors**

2

3 **Authors:** Andres M. Lebensohn and Rajat Rohatgi

4

5 **Affiliations:** Departments of Biochemistry and Medicine, Stanford University School of

6 Medicine, Stanford, CA 94305, USA.

## 7 **Text**

8           The WNT signaling pathway regulates patterning and morphogenesis during embryonic  
9 development and promotes tissue renewal and regeneration in adults<sup>1,2</sup>. Some WNT responses in  
10 vertebrates depend on a second signal provided by the R-spondin family of four secreted proteins  
11 (RSPO1-4) that drive the renewal of stem cells in many tissues<sup>3,4</sup>. RSPOs markedly amplify  
12 target cell sensitivity to WNT ligands by neutralizing two transmembrane E3 ligases, ZNRF3  
13 and RNF43, which reduce cell-surface levels of WNT receptors<sup>5,6</sup>. Chromosomal translocations  
14 that increase RSPO expression or that inactivate ZNRF3/RNF43 can drive human cancers<sup>7</sup>.  
15 RSPOs contain tandem furin-like repeats (FU1 and FU2), a thrombospondin type I (TSP)  
16 domain, and a basic region (BR). RSPOs simultaneously engage ZNRF3/RNF43 through their  
17 FU1 domain and one of three leucine-rich repeat-containing G-protein coupled receptors (LGR4-  
18 6) through their FU2 domain<sup>8-12</sup>, triggering the clearance of ZNRF3/RNF43 and the consequent  
19 rise in WNT receptor levels. LGRs are selectively expressed in various tissue stem cells and are  
20 considered the primary high-affinity receptors for RSPOs<sup>13-15</sup>. Using purified mutant and  
21 chimeric RSPOs and cell lines lacking various receptors, we show that RSPO2 and RSPO3, but  
22 not RSPO1 and RSPO4, can potentiate WNT/ $\beta$ -catenin signaling in the absence of all three  
23 LGRs. The ZNRF3/RNF43-interacting FU1 domain was necessary for LGR-independent  
24 signaling, while the LGR-interacting FU2 domain was dispensable. The FU1 domain of RSPO3  
25 was also sufficient to confer LGR-independence when transplanted to RSPO1, demonstrating  
26 that its interaction with ZNRF3/RNF43 dictates LGR-independent signaling. The enigmatic  
27 TSP/BR domains of RSPOs and their interaction with heparan sulfate proteoglycans (HSPGs),  
28 previously considered dispensable for WNT/ $\beta$ -catenin signaling<sup>16,17</sup>, became essential in the  
29 absence of LGRs. These results define two alternative modes of RSPO-mediated signaling that

30 share a common dependence on ZNRF3/RNF43, but differ in their use of either LGRs or  
31 HSPGs, with implications for understanding their mechanism of action, biological functions and  
32 evolutionary origins.

33 In previous work<sup>18</sup>, we generated and thoroughly characterized a haploid human cell line  
34 (HAP1-7TGP) that harbors a fluorescent transcriptional reporter for WNT/ $\beta$ -catenin signaling.  
35 Both the fluorescence of this synthetic reporter and the transcription of endogenous WNT target  
36 genes in HAP1-7TGP cells can be activated by WNT ligands, and these WNT responses can be  
37 strongly potentiated by RSPOs<sup>18</sup>. HAP1-7TGP cells do not secrete WNT ligands and thus their  
38 response to RSPOs requires the co-administration of a low concentration of WNT. A  
39 comprehensive set of unbiased genetic screens in HAP1-7TGP identified most of the known  
40 components required for a signaling response to RSPO and WNT ligands, establishing this cell  
41 line as a valid and genetically tractable system for the study of this pathway<sup>18</sup>.

42 We made the serendipitous and unexpected observation that RSPO3 could potentially  
43 enhance WNT reporter fluorescence driven by a low concentration of WNT3A in two  
44 independently derived HAP1-7TGP clonal cell lines carrying loss of function mutations in *LGR4*  
45 (*LGR4*<sup>KO</sup> cells; see Methods and Supplementary Data File 1) (Fig. 1a). In contrast, RSPO1 was  
46 inactive in *LGR4*<sup>KO</sup> cells. RSPO1 and RSPO3 had equivalent activity in wild-type (WT) HAP1-  
47 7TGP cells, demonstrating that both ligands were active, and responses in both WT and *LGR4*<sup>KO</sup>  
48 cells depended on the presence of WNT3A (Fig. 1a).

49 While *LGR4* is the only RSPO receptor expressed in HAP1 cells (Extended Data Table  
50 1), we excluded the possibility of compensatory up-regulation of *LGR5* or *LGR6* by  
51 simultaneously disrupting both genes in *LGR4*<sup>KO</sup> cells, generating multiple independent clonal  
52 cell lines lacking all three RSPO receptors (hereafter called *LGR4/5/6*<sup>KO</sup> cells; Supplementary

53 Data File 1). LGR4/5/6<sup>KO</sup> cells retained an intact WNT signaling cascade, responding normally  
54 to a saturating dose of WNT3A (Fig. 1b). All four RSPOs strongly potentiated WNT signaling in  
55 WT cells, establishing ligand activity. However, RSPO1 and RSPO4 were completely inactive in  
56 LGR4/5/6<sup>KO</sup> cells, even at concentrations that induced maximum WNT reporter induction in WT  
57 cells, whereas RSPO2 and RSPO3 strongly potentiated signaling driven by low concentrations of  
58 WNT3A even in the absence of all three LGR receptors (Fig. 1b). Therefore, RSPO2 and RSPO3  
59 possess a unique quality absent in RSPO1 and RSPO4 that enables them to potentiate WNT  
60 responses without LGR receptors.

61 Dose-response analysis revealed that RSPO1 and RSPO3 enhanced WNT signaling in  
62 WT cells with nearly identical pharmacodynamics—both the efficacy (maximum reporter  
63 activity) and the potency (measured by the EC<sub>50</sub>, defined as the RSPO concentration that  
64 induced half-maximum reporter activity) were similar for both ligands (Fig. 1c). In LGR4/5/6<sup>KO</sup>  
65 cells, RSPO1 had no detectable activity at concentrations up to 160 ng/ml, 400-fold higher than  
66 its EC<sub>50</sub> (0.4 ng/ml) in WT cells. While RSPO3 potentiated WNT signaling in LGR4/5/6<sup>KO</sup>  
67 cells, its efficacy was reduced by 33% and its EC<sub>50</sub> was increased by 16-fold compared to WT  
68 cells (6.4 ng/ml vs. 0.4 ng/ml; Fig. 1c). The distinct RSPO3 pharmacodynamics in the two cell  
69 types suggested that the reception of RSPO3 was mediated by different mechanisms in the  
70 presence and absence of LGR receptors.

71 We sought to determine which domains of RSPO3 were required for LGR-independent  
72 signaling using a ligand mutagenesis strategy (Fig. 2a). Our experimental strategy leveraged a  
73 comparison between RSPO1 and RSPO3, since the former depended strictly on LGR receptors  
74 while the latter could signal in their absence. Unless otherwise noted, each WT and mutant  
75 RSPO ligand described hereafter was produced as a fusion protein carrying an N-terminal

76 hemagglutinin (HA) tag and a tandem C-terminal tag composed of an immunoglobulin fragment  
77 crystallizable (Fc) domain followed by a 1D4 epitope tag<sup>19</sup> used for immuno-affinity purification  
78 (see Extended Data Fig. 1a, b, and Methods for a description of ligand purification and  
79 characterization). Importantly, the pharmacodynamics of the tagged RSPO proteins were similar  
80 to those of their untagged counterparts in both WT and LGR4/5/6<sup>KO</sup> cells (Extended data Fig. 1c,  
81 d).

82 Previous studies have shown that the FU1 and FU2 domains in all RSPOs, which bind to  
83 ZNRF3/RNF43 and LGRs, respectively, are both necessary and sufficient to potentiate WNT  
84 responses, while the TSP and BR domains are dispensable<sup>16</sup>. Simultaneous deletion of the FU1  
85 and FU2 domains of RSPO3 abolished signaling in both WT and LGR4/5/6<sup>KO</sup> cells (Fig. 2b).  
86 Point mutations in the FU1 domain (R67A/Q72A; Fig. 2a) known to weaken the interaction  
87 between RSPOs and ZNRF3/RNF43<sup>20</sup> entirely abolished RSPO3 signaling in LGR4/5/6<sup>KO</sup> cells  
88 (Fig. 2b, d) and substantially reduced (but did not abolish) RSPO3 signaling in WT cells (EC50  
89 increased by 21-fold; Fig. 2b, c). Thus, the reduction in the affinity between RSPO3 and  
90 ZNRF3/RNF43 caused by the FU1 R67A/Q72A mutation impaired LGR-independent signaling  
91 to a much greater extent than LGR-dependent signaling. Indeed, the equivalent R66A/Q71A  
92 mutation in RSPO1 (Fig. 2a), which only signals in an LGR-dependent manner, also impaired  
93 but did not completely abolish signaling in WT cells (Fig. 2b).

94 Point mutations in the FU2 domain (F106E/F110E; Fig. 2a) of RSPO3 that weaken  
95 interactions with LGR receptors<sup>20</sup> had little impact on RSPO3 signaling in LGR4/5/6<sup>KO</sup> cells,  
96 consistent with the lack of LGRs in these cells (Fig. 2b, d). In WT cells, the F106E/F110E  
97 mutation in RSPO3 did not prevent signaling, but reduced the efficacy by 48% and increased the  
98 EC50 by 2.9-fold (Fig. 2c). Thus, RSPO3 signaling in WT cells includes contributions from both

99 LGR-dependent and independent pathways. In contrast, the F106E/F110E mutation in RSPO1  
100 abolished signaling in WT cells, demonstrating that signaling by RSPO1 depends entirely on its  
101 interaction with LGR receptors (Fig. 2b).

102 The C-terminal TSP and BR domains of RSPOs (denoted TSP/BR when discussed  
103 together) are considered dispensable for LGR-mediated signaling<sup>15</sup>. When we deleted these  
104 domains individually in RSPO3, there were only minor effects on signaling in WT cells (Fig. 2e,  
105 f). Deletion of both domains in RSPO3 increased the EC<sub>50</sub> in WT cells by 333-fold, but did not  
106 change the efficacy (Fig. 2f). The signaling properties of RSPO3 lacking the TSP/BR domains  
107 were unchanged when the dimerizing Fc tag was removed (Fig. 2f). Therefore, while the  
108 TSP/BR domains are not essential for signaling in WT cells, consistent with prior work, their  
109 loss substantially reduces the apparent potency of RSPO3. In contrast, RSPO3 lacking the  
110 TSP/BR domains could not potentiate WNT responses in LGR4/5/6<sup>KO</sup> cells (Fig. 2e, g).

111 These mutagenesis experiments demonstrated that the FU1 and TSP/BR domains of  
112 RSPO3 are required for its ability to potentiate WNT responses in the absence of LGR receptors,  
113 while the FU2 domain is dispensable. These domain requirements are distinct from those for  
114 LGR-mediated signaling by RSPO1, which depends on the FU1 and FU2, but not on the TSP/BR  
115 domains. In WT cells, RSPO3 signaling proceeded through both LGR-dependent and  
116 independent mechanisms because disruption of the FU2 or the TSP/BR domains partially  
117 impaired but did not abolish signaling (Fig. 2c, f). The ZNRF3/RNF43-interacting FU1 domain  
118 is essential for signaling both in the presence and absence of LGR receptors.

119 To identify the region of RSPO3 that confers the property of LGR-independent signaling,  
120 we constructed a series of chimeric ligands, combining regions of RSPO1 and RSPO3 (Fig. 3a).  
121 Remarkably, replacing the FU1 domain of RSPO1 with the FU1 domain of RSPO3 enabled

122 RSPO1 to potentiate WNT signaling in LGR4/5/6<sup>KO</sup> cells (Fig. 3b, d). Conversely, replacing the  
123 FU1 domain of RSPO3 with that of RSPO1 drastically reduced the signaling capacity of RSPO3  
124 in LGR4/5/6<sup>KO</sup> cells (Fig. 3b, d). In important control experiments, all chimeric ligands showed  
125 equivalent activity in WT cells, establishing ligand integrity (Fig. 3b, c). Thus, a difference in the  
126 interaction between ZNRF3/RNF43 and the FU1 domains of RSPO1 and RSPO3 is the crucial  
127 determinant of LGR-independent signaling. Of note, the affinities of the FU1-FU2 fragment of  
128 RSPO2 (25 nM) and RSPO3 (60 nM) for ZNRF3 have been reported to be much higher than  
129 those of RSPO1 (6.8  $\mu$ M) and RSPO4 (300  $\mu$ M)<sup>12</sup>. Indeed, these affinities correlate with the  
130 capacity of RSPO2 and RSPO3, but not RSPO1 or RSPO4, to promote LGR-independent  
131 signaling (Fig. 1b). While the TSP/BR domains of RSPO3 were required for LGR-independent  
132 signaling, they were not sufficient because replacement of the TSP/BR domains of RSPO1 with  
133 those of RSPO3 did not confer the capacity to signal in LGR4/5/6<sup>KO</sup> cells (Fig. 3e). In fact, the  
134 TSP/BR domains of RSPO1 and RSPO3 seemed interchangeable for signaling activity in both  
135 WT and LGR4/5/6<sup>KO</sup> cells (Fig. 3e).

136         These results suggested that the WNT-potentiating activity of RSPO3 in the absence of  
137 the LGRs depends on its interaction with ZNRF3/RNF43 through the FU1 domain and an  
138 additional interaction with an alternative co-receptor through the TSP/BR domains. We  
139 considered the previous observation that the TSP/BR domains of RSPOs can bind to heparin<sup>21</sup>.  
140 Addition of heparin to the culture medium completely blocked signaling by RSPO3 in  
141 LGR4/5/6<sup>KO</sup> cells, but had only a partial inhibitory effect on WT cells, in which RSPO3 can also  
142 signal through LGRs (Fig. 4a).

143         The TSP/BR domains of RSPOs can mediate interactions with the two major families of  
144 cell-surface heparan sulfate proteoglycans (HSPGs), the transmembrane syndecans and the

145 glycosphosphatidylinositol (GPI)-linked glypicans<sup>17</sup>. In humans, both protein families are  
146 encoded by multiple, partially redundant genes: four syndecan genes (*SDC1-4*) and six glypican  
147 genes (*GPC1-6*)<sup>22</sup>, all of which are expressed in HAP1 cells (Extended Data Table 1), making  
148 their genetic analysis challenging. Since all syndecans and glypicans must be post-translationally  
149 modified with heparan sulfate chains for receptor function, we disrupted *EXTL3*, a gene  
150 encoding a glycosyltransferase that is specifically required for HSPG biosynthesis, but  
151 dispensable for the synthesis of other glycosaminoglycans and proteoglycans<sup>23</sup>. The loss of  
152 *EXTL3* in *LGR4/5/6*<sup>KO</sup> cells led to an 81% reduction in RSPO3-mediated potentiation of WNT  
153 signaling (Fig. 4b). In contrast, the loss of *EXTL3* in WT cells only reduced signaling by 34%,  
154 likely because RSPO3 can also signal through LGR receptors in WT cells. In an important  
155 control, the loss of *EXTL3* did not affect signaling induced by addition of WNT3A alone or by  
156 inhibition of the  $\beta$ -catenin destruction complex kinase GSK3 in either WT or *LGR4/5/6*<sup>KO</sup> cells  
157 (Fig. 4c).

158 To distinguish between syndecans and glypicans, we took advantage of the fact that only  
159 glypicans are anchored to the cell surface by a GPI linkage. Disrupting *PIGL*, a gene required for  
160 GPI-anchor biosynthesis, or disrupting both *GPC4* and *GPC6* (the two glypican genes identified  
161 in our previous haploid genetic screens<sup>18</sup>) in *LGR4/5/6*<sup>KO</sup> cells did not impair LGR-independent  
162 potentiation of WNT signaling by RSPO3 (Fig. 4d).

163 These results suggest that the interaction of the TSP/BR domains of RSPO3 with cell  
164 surface HSPGs, possibly syndecans, provides an alternative mechanism that neutralizes  
165 ZNRF3/RNF43 in the absence of LGR receptors (Fig. 4e). Cell-surface HSPGs are known to  
166 mediate the efficient endocytosis of multiple cargoes<sup>24</sup>. Hence, we speculate that the  
167 simultaneous interaction of RSPO3 with ZNRF3/RNF43 through its FU1 domain and cell



168 surface HSPGs through its TSP/BR domains provides an LGR-independent route for the  
169 endocytosis and clearance of ZNRF3/RNF43 from the cell surface (Fig. 4e), and the consequent  
170 rise in WNT receptor levels.

171 Our work shows that RSPOs can potentiate WNT signals in the absence of LGR  
172 receptors, expression of which has been hitherto considered the hallmark of RSPO-responsive  
173 cells. Future work will define the developmental, regenerative, and oncogenic contexts in which  
174 this LGR-independent mode of signaling is used to amplify target cell responses to WNT  
175 ligands. The mutant and chimeric RSPO ligands we described should allow the selective  
176 modulation of these alternate modes of signaling to dissect their biological roles.

177 **Methods**

178           The following materials and methods relevant to this manuscript have been described  
179 previously<sup>18</sup>: cell lines and growth conditions, preparation of WNT3A conditioned medium  
180 (CM) and construction of the HAP1-7TGP WNT reporter haploid cell line.

181

182 **Plasmids**

183           pCX-Tev-Fc (unpublished) was a gift from Henry Ho (University of California Davis,  
184 Davis, CA). pHLsec-HA-Avi-1D4 (unpublished, derived from pHLSec<sup>25</sup> by incorporating a C-  
185 terminal HA tag following the signal sequence, and an N-terminal Gly/Ser linker, AviTag  
186 biotinylation sequence and 1D4 tag<sup>19</sup>) was a gift from Christian Siebold (University of Oxford,  
187 Oxford, United Kingdom). RSPO1-GFP<sup>26</sup> was a gift from Feng Cong (Developmental and  
188 Molecular Pathways, Novartis Institutes for Biomedical Research, Cambridge, MA). MGC  
189 Human RSPO3 Sequence-Verified cDNA was purchased (GE Dharmacon cat. # MHS6278-  
190 202841214). pX330-U6-Chimeric\_BB-CBh-hSpCas9 (pX330) was a gift from Feng Zhang  
191 (Addgene plasmid # 42230).

192           pHLsec-HA-hRSPO1-Tev-Fc-Avi-1D4 and pHLsec-HA-hRSPO3-Tev-Fc-Avi-1D4 were  
193 constructed through a two-step subcloning strategy. In the first step, human RSPO1 and human  
194 RSPO3 were amplified by PCR with forward primers pCX-RSPO1-F (5'- GAG GCT AGC ACC  
195 ATG CGG CTT GGG CTG TGT G-3') or pCX-RSPO3-F (5'-GAG GCT AGC ACC ATG CAC  
196 TTG CGA CTG ATT TCT TG-3'), containing an NheI restriction site, and reverse primers pCX-  
197 RSPO1-R (5'-TGA GGT ACC AAG GCA GGC CCT GCA GAT GTG-3') or pCX-RSPO3-R  
198 (5'- TGA GGT ACC AAG TGT ACA GTG CTG ACT GAT ACC GA-3'), containing a KpnI  
199 restriction site. The products were digested with NheI and KpnI and subcloned into pCX-Tev-Fc

200 digested at the same sites. In the second step, a fragment containing RSPO1 or RSPO3 followed  
201 by two tandem Tev cleavage sites, a linker and the Fc domain of human IgG was amplified by  
202 PCR from pCX-RSPO1-Tev-Fc or pCX-RSPO3-Tev-Fc, respectively, using forward primers  
203 pHL-SEC-RSPO1-F-gibson (5'- CGA CGT GCC CGA CTA CGC CAC CGG TAA CCT GAG  
204 CCG GGG GAT CAA GGG G-3') or pHL-SEC-RSPO3-F-gibson (5'- CGA CGT GCC CGA  
205 CTA CGC CAC CGG TAA CCT GCA AAA CGC CTC CCG GG-3') and reverse primer pHL-  
206 SEC-FC-R-gibson-no-KpnI (5'- ACC ACC GGA ACC TCC GGT ACT TTT ACC CGG AGA  
207 CAG GGA GA-3'). The forward and reverse primers contained 24 base pair (bp) overhangs  
208 complementary to pHLsec-HA-Avi-1D4 upstream of the unique AgeI site and downstream of the  
209 unique KpnI site in the vector, respectively. The reverse primer contained a mutation that  
210 eliminated the KpnI site in pHLsec-HA-Avi-1D4, hence retaining only one KpnI site between  
211 RSPO1 or RSPO3 and the Tev cleavage sites in the resulting construct. The PCR products were  
212 subcloned by Gibson assembly (using Gibson Assembly Master Mix, NEB Cat. # E2611L) into  
213 pHLsec-HA-Avi-1D4 digested with AgeI and Acc65I (an isoschizomer of KpnI) to produce  
214 pHLsec-HA-RSPO1-Tev-Fc-Avi-1D4 and pHLsec-HA-RSPO3-Tev-Fc-Avi-1D4, which contain  
215 a single AgeI site upstream and a single KpnI site downstream of the RSPO coding sequence.  
216 Henceforth, we refer to the vector backbone of this new constructs as pHLsec-HA-Tev-Fc-Avi-  
217 1D4.

218 Human RSPO1 and RSPO3 mutants and chimeras (Figs. 2a, 3a and Supplementary Data  
219 File 2) were generated synthetically as gBlocks Gene Fragments (IDT), flanked at the 5' and 3'  
220 ends, respectively, by 24 bp overhangs overlapping the sequence upstream of the unique AgeI  
221 site and downstream of the unique KpnI site in the pHLsec-HA-Tev-Fc-Avi-1D4 vector. The

222 gBlocks were subcloned into pHLsec-HA-Tev-Fc-Avi-1D4, digested with AgeI and KpnI, using  
223 the NEBuilder HiFi DNA Assembly Master Mix (NEB Cat. # E2621L).

224 To remove the dimerizing Fc tag from RSPO3  $\Delta$ TSP/BR, a fragment lacking the TSP and  
225 BR domains of RSPO3 was amplified by PCR using forward primer pHL-SEC-RSPO3-F-gibson  
226 (sequence described above) and reverse primer pHL-SEC-AVI-1D4-RSPO3FU2-R-gibson (5'-  
227 AGA CCG GAA CCA CCG GAA CCT CCG GTA CCC ACA ATA CTG ACA CAC TCC  
228 ATA GTA TGG TTG T-3'), containing 24 bp overhangs complementary to pHLsec-HA-Avi-  
229 1D4 upstream of the unique AgeI site and downstream of the unique KpnI site in the vector,  
230 respectively. The PCR product and pHLsec-HA-Avi-1D4 vector were both digested with AgeI  
231 and KpnI, and ligated to produce pHLsec-HA-RSPO3 $\Delta$ TSP/BR-Avi-1D4.

232 All constructs were sequenced fully and will be deposited in Addgene.

233

#### 234 **Analysis of WNT reporter fluorescence**

235 To measure WNT reporter activity in HAP1-7TGP cells or derivatives thereof, ~24 hrs  
236 before treatment cells were seeded in 96-well plates at a density of  $1.5 \times 10^4$  per well and grown in  
237 100  $\mu$ l of complete growth medium (CGM) 2<sup>18</sup>. Cells were treated for 20-24 hrs with the  
238 indicated concentrations of WNT3A CM, untagged recombinant human R-Spondin 1, 2, 3 or 4  
239 (R&D Systems Cat. # 4645-RS, 3266-RS, 3500-RS or 4575-RS, respectively), tagged RSPO1-4  
240 proteins (see below) or CHIR-99021 (CT99021) (Selleckchem Cat. # S2924), all diluted in CGM  
241 2. Cells were washed with 100  $\mu$ l phosphate buffered saline (PBS), harvested in 30  $\mu$ l of 0.05%  
242 trypsin-EDTA solution (Gemini Bio-Products Cat. # 400-150), resuspended in 120  $\mu$ l of CGM 2,  
243 and EGFP fluorescence was measured immediately by FACS on a BD LSRFortessa cell analyzer

244 (BD Biosciences) using a 488 laser and 505LP, 530/30BP filters, or on a BD Accuri RUO  
245 Special Order System (BD Biosciences).

246 For the experiments shown in Figs. 1c, 2b, 2e, 3b, 3e and 4b-d, cells were treated in  
247 duplicate or triplicate wells, fluorescence data for 5,000-10,000 singlet-gated cells was collected,  
248 and the median EGFP fluorescence for each well and/or the average +/- standard deviation (SD)  
249 of the median EGFP fluorescence from each well (as indicated in the figure legends) was used to  
250 represent the data. The results from one representative experiment out of at least two conducted  
251 on separate days are presented. For the experiments shown in figures 1a-b, 2c-d, 2f-g, 3c-d, 4a,  
252 and Extended Data Figs. 1c-d, cells were treated in single wells and fluorescence data for 5,000-  
253 10,000 singlet-gated cells was collected. The median EGFP fluorescence and, when compatible  
254 with clarity, the standard error of the median ( $SEM = 1.253 \sigma / \sqrt{n}$ , where  $\sigma$  = standard deviation  
255 and  $n$  = sample size) from each well was used to represent the data. Dose-response curves were  
256 fitted using the nonlinear regression (curve fit) analysis tool in GraphPad Prism 7 using the  
257 [agonist] vs. response –variable slope (four parameters) equation with least squares (ordinary) fit  
258 option.

259

## 260 **Construction of mutant HAP1-7TGP cell lines by CRISPR/Cas9-mediated genome editing**

261 Oligonucleotides encoding single guide RNAs (sgRNAs) (Supplementary Data File 3)  
262 were selected from one of two published libraries<sup>27,28</sup> and cloned into pX330 according to a  
263 published protocol<sup>29</sup> (original version of “Target Sequence Cloning Protocol” from  
264 [http://www.genome-engineering.org/crispr/wp-content/uploads/2014/05/CRISPR-Reagent-  
265 Description-Rev20140509.pdf](http://www.genome-engineering.org/crispr/wp-content/uploads/2014/05/CRISPR-Reagent-Description-Rev20140509.pdf)).

266 Clonal HAP1-7TGP cell lines were established by transient transfection with pX330  
267 containing the sgRNA, followed by single cell sorting as described previously<sup>18</sup>. Genotyping was  
268 done as described previously<sup>18</sup> using the primers indicated in Supplementary Data File 3. To  
269 generate triple, quadruple and quintuple knock-out (KO) cell lines, a single clonal cell line with  
270 the first desired mutation or mutations was used in subsequent rounds of transfection with pX330  
271 containing additional sgRNAs. To facilitate screening of mutant clones by PCR when targeting  
272 two genes simultaneously, we sometimes targeted one of the two genes at two different sites  
273 within the same exon or in adjacent exons and amplified genomic sequence encompassing both  
274 target sites. Mutant clones were readily identified by the altered size of the resulting amplicon,  
275 and the precise lesions were confirmed by sequencing the single allele of each gene present in  
276 HAP1 cells.

277

278 **Production of tagged RSPO proteins by transient transfection of 293T cells and**  
279 **immunoaffinity-purification from conditioned media (see Extended Data Fig. 1a)**

280 ~24 hours before transfection,  $14 \times 10^6$  293T cells were seeded in each of two T-175 flasks  
281 for transfection with each construct, each flask containing 30 ml of CGM 1<sup>18</sup>. Once they had  
282 reached 60-80% confluency, the cells in each flask were transfected with 1 ml of a transfection  
283 mix prepared as follows: 22.3  $\mu$ g of pHLsec-HA-RSPO-Tev-Fc-Avi-1D4 construct encoding  
284 WT or mutant/chimeric RSPO proteins was diluted in 930  $\mu$ l of serum-free DMEM (GE  
285 Healthcare Life Sciences Cat. # SH30081.01) and 70  $\mu$ l of polyethylenimine (PEI, linear, MW  
286 ~25,000, Polysciences, Inc. Cat. # 23966) were added from a 1 mg/ml stock (prepared in sterile  
287 water, stored frozen and equilibrated to 37°C before use). The transfection mix was vortexed  
288 briefly, incubated for 15-20 minutes at room temperature (RT) and added to the cells without

289 replacing the growth medium. ~16 hrs post-transfection, the cells were washed with 30 ml PBS  
290 and the medium was replaced with 28 ml of CD 293 medium (Thermo Fisher Scientific Cat. #  
291 11913019) supplemented with 1x L-glutamine solution (stabilized, Gemini Bio-Products Cat. #  
292 400-106), 1x penicillin/streptomycin solution (Gemini Bio-Products Cat. # 400-109) and 2 mM  
293 valproic acid (Sigma-Aldrich Cat. # P4543, added from a 0.5 M stock prepared in water and  
294 sterilized by filtration through a 0.22  $\mu$ m filter) to promote protein expression.

295 ~90 hrs post-transfection, the CM from each of the two flasks, containing secreted,  
296 tagged RSPO protein, was centrifuged for 5 min at 400 x g to pellet detached cells. The  
297 supernatant was centrifuged for 5 min at 4000 x g and filtered through 0.45  $\mu$ m filters (Acrodisc  
298 syringe filters with Supor membrane, Pall Corporation) to remove particulates, and was reserved  
299 on ice.

300 Rho 1D4 immunoaffinity resin was prepared by coupling Rho 1D4 purified monoclonal  
301 antibody (University of British Columbia, <https://uilo.ubc.ca/rho-1d4-antibody>) to CNBr-  
302 activated sepharose 4B (GE Healthcare Life Sciences Cat. # 17-0430-01). Briefly, 1 g of dry  
303 CNBr-activated sepharose 4B was dissolved in 50 ml of 1 mM HCl and allowed to swell. The  
304 resin was transferred to an Econo-Pac chromatography column (Biorad Cat. # 7321010) and  
305 washed by gravity flow with 50 ml of 1 mM HCl, followed by 50 ml of 0.1 M NaHCO<sub>3</sub>, 0.5 M  
306 NaCl, pH 8.5. 14 mg of Rho 1D4 antibody were dissolved in 0.1 M NaHCO<sub>3</sub>, 0.5 M NaCl, pH  
307 8.5, and incubated with the resin overnight, rotating at 4°C. The resin was washed with 50 ml of  
308 0.2 M glycine, pH 8.0, and incubated for 2 hrs in the same buffer, rotating at RT. The resin was  
309 washed sequentially with 50 ml each of: 0.1 M NaHCO<sub>3</sub>, 0.5 M NaCl, pH 8.5; 0.1 M NaOAc,  
310 0.5 M NaCl, pH 4.0; 0.1 M NaHCO<sub>3</sub>, 0.5 M NaCl, pH 8.5; PBS, 10 mM NaN<sub>3</sub>. The packed resin

311 was resuspended in an equal volume of PBS, 10 mM NaN<sub>3</sub> to make a ~50% slurry, aliquoted and  
312 stored at 4°C.

313 300 µl of the ~50% slurry of Rho 1D4 resin was added to a 50 ml conical tube containing  
314 the CM, and the suspension was incubated 10 hrs rocking at 4°C. Following binding and during  
315 all subsequent washes, the resin was collected by centrifugation for 5 min at 400 x g in a  
316 swinging bucket rotor. The beads were wash three times at RT with 25 ml PBS by resuspending  
317 the beads in buffer and mixing by inverting for ~1 min. Following the third wash the resin was  
318 transferred to a 1.5 ml Eppendorf tube and washed three times with 1.4 ml of PBS, 10% glycerol.

319 Following the last wash, the buffer was aspirated and the resin was resuspended in 150 µl  
320 of PBS, 10% glycerol to obtain a ~50% slurry. Tagged RSPO protein was eluted by adding 3 µl  
321 of a 25 mM stock of 1D4 peptide ((NH<sub>3</sub>)-T-E-T-S-Q-V-A-P-A-(COOH)) for a final  
322 concentration of 250 µM. Elution was carried out by rotating the tube sideways overnight at 4°C.  
323 Following centrifugation of the resin, the eluate was recovered and reserved on ice. The resin  
324 was resuspended in 150 µl of PBS, 10% glycerol, and 250 µM 1D4 peptide was added. A second  
325 round of elution was carried out for 1 hr at RT. Following centrifugation of the resin, the second  
326 eluate was recovered and pooled with the first. The final eluate was centrifuged once again to  
327 remove residual resin, and the supernatant was aliquoted, frozen in liquid nitrogen and stored at -  
328 80°C.

329

### 330 **Quantification of tagged RSPO proteins by PAGE (see Extended Data Fig. 1b)**

331 4.5 µl and 13.5 µl of the final eluates containing tagged RSPO proteins were diluted with  
332 4x LDS sample buffer (Thermo Fisher Scientific Cat. # NP0007) supplemented with 50 mM  
333 *tris*(2-carboxyethyl)phosphine (TCEP), heated for 10 min at 95°C, and loaded alongside



334 Precision Plus Protein molecular weight standards (Bio-Rad Cat. # 1610373) and bovine serum  
335 albumin (BSA) standards (Thermo Fisher Scientific Cat. # 23209) for quantification. Proteins  
336 were electrophoresed in NuPAGE 4-12% Bis-Tris gels (Thermo Fisher Scientific) using 1X  
337 NuPAGE MES SDS running buffer (Thermo Fisher Scientific Cat. # NP0002).

338 Gels were fixed in 50% methanol, 7% acetic acid for 30 min, rinsed for 1.5 hrs with  
339 several changes of water, stained for 2 hrs with GelCode Blue Stain Reagent (based on colloidal  
340 coomassie dye G-250, Thermo Fisher Scientific Cat. # 24590), de-stained in water overnight,  
341 and imaged using the Li-Cor Odyssey imaging system. Acquisition parameters for coomassie  
342 fluorescence (700 nm channel) were set so as to avoid saturated pixels, and bands with intensities  
343 within the linear range of fluorescence for the BSA standards were quantified using manual  
344 background subtraction.

345

#### 346 **Immunoblot analysis of tagged RSPO proteins (see Extended Data Fig. 1b)**

347 50 ng of tagged RSPO proteins were electrophoresed as described above. Proteins were  
348 transferred to nitrocellulose membranes in a Criterion Blotter apparatus (Bio-Rad Cat. #  
349 1704071) using 1X NuPAGE transfer buffer (Thermo Fisher Scientific Cat. # NP0006)  
350 containing 10% methanol. Membranes were blocked with Odyssey Blocking Buffer (Li-Cor Cat.  
351 # 927-40000), incubated overnight at 4°C with purified anti-HA.11 Epitope Tag primary  
352 antibody (BioLegend Cat. # 901501, previously Covance cat. # MMS-101P) diluted 1:1,500 in  
353 blocking solution (a 1 to 1 mixture of Odyssey Blocking Buffer (Li-Cor Cat. # 927-40000) and  
354 TBST (Tris buffered saline (TBS) + 0.1% Tween-20)), washed with TBST, incubated for 1 hr at  
355 RT with IRDye 800CW donkey anti-mouse IgG (H+L) (Li-Cor Cat. # 926-32212) diluted

356 1:10,000 in blocking solution, washed with TBST followed by TBS, and imaged using the Li-  
357 Cor Odyssey imaging system.

358

### 359 **Preparation of figures and statistical analysis**

360 Illustrations were prepared using PowerPoint (Microsoft) and Illustrator CS6 (Adobe).  
361 Tables and supplementary files were prepared using Excel and Word (Microsoft). Bar graphs,  
362 dose-response graphs and circle graphs were prepared using Prism 7 (GraphPad Software) and  
363 statistical analysis was performed using the same software. For comparisons between two  
364 datasets, significance was determined by unpaired t test; for comparisons between more than two  
365 datasets, significance was determined by one-way ANOVA. Significance is indicated as \*\*\*\* ( $p$   
366  $< 0.0001$ ), \*\* ( $p < 0.01$ ), \* ( $p < 0.05$ ) or ns (not significant). Pictures of gels and immunoblots  
367 were only adjusted for contrast and brightness when necessary for clarity using Photoshop CS6  
368 (Adobe), and were arranged in Illustrator CS6.

369

### 370 **Data availability**

371 All data generated or analyzed during this study are included in this published article (and  
372 its supplementary information files).

## 373 **References**

- 374 1 Hoppler, S. & Moon, R. T. *Wnt signaling in development and disease : molecular*  
375 *mechanisms and biological functions*. (Wiley Blackwell, 2014).
- 376 2 Clevers, H., Loh, K. M. & Nusse, R. Stem cell signaling. An integral program for tissue  
377 renewal and regeneration: Wnt signaling and stem cell control. *Science* **346**, 1248012,  
378 doi:10.1126/science.1248012 (2014).
- 379 3 de Lau, W. B., Snel, B. & Clevers, H. C. The R-spondin protein family. *Genome Biol* **13**,  
380 242, doi:10.1186/gb-2012-13-3-242 (2012).
- 381 4 de Lau, W., Peng, W. C., Gros, P. & Clevers, H. The R-spondin/Lgr5/Rnf43 module:  
382 regulator of Wnt signal strength. *Genes Dev* **28**, 305-316, doi:10.1101/gad.235473.113  
383 (2014).
- 384 5 Koo, B. K. *et al.* Tumour suppressor RNF43 is a stem-cell E3 ligase that induces  
385 endocytosis of Wnt receptors. *Nature* **488**, 665-669, doi:10.1038/nature11308 (2012).
- 386 6 Hao, H. X. *et al.* ZNRF3 promotes Wnt receptor turnover in an R-spondin-sensitive  
387 manner. *Nature* **485**, 195-200, doi:10.1038/nature11019 (2012).
- 388 7 Hao, H. X., Jiang, X. & Cong, F. Control of Wnt Receptor Turnover by R-spondin-  
389 ZNRF3/RNF43 Signaling Module and Its Dysregulation in Cancer. *Cancers (Basel)* **8**,  
390 doi:10.3390/cancers8060054 (2016).
- 391 8 Peng, W. C. *et al.* Structure of stem cell growth factor R-spondin 1 in complex with the  
392 ectodomain of its receptor LGR5. *Cell Rep* **3**, 1885-1892,  
393 doi:10.1016/j.celrep.2013.06.009 (2013).

- 394 9 Wang, D. *et al.* Structural basis for R-spondin recognition by LGR4/5/6 receptors. *Genes*  
395 *Dev* **27**, 1339-1344, doi:10.1101/gad.219360.113 (2013).
- 396 10 Chen, P. H., Chen, X., Lin, Z., Fang, D. & He, X. The structural basis of R-spondin  
397 recognition by LGR5 and RNF43. *Genes Dev* **27**, 1345-1350, doi:10.1101/gad.219915.113  
398 (2013).
- 399 11 Xu, K., Xu, Y., Rajashankar, K. R., Robev, D. & Nikolov, D. B. Crystal structures of Lgr4 and  
400 its complex with R-spondin1. *Structure* **21**, 1683-1689, doi:10.1016/j.str.2013.07.001  
401 (2013).
- 402 12 Zebisch, M. *et al.* Structural and molecular basis of ZNRF3/RNF43 transmembrane  
403 ubiquitin ligase inhibition by the Wnt agonist R-spondin. *Nat Commun* **4**, 2787,  
404 doi:10.1038/ncomms3787 (2013).
- 405 13 de Lau, W. *et al.* Lgr5 homologues associate with Wnt receptors and mediate R-spondin  
406 signalling. *Nature* **476**, 293-297, doi:10.1038/nature10337 (2011).
- 407 14 Carmon, K. S., Gong, X., Lin, Q., Thomas, A. & Liu, Q. R-spondins function as ligands of  
408 the orphan receptors LGR4 and LGR5 to regulate Wnt/beta-catenin signaling. *Proc Natl*  
409 *Acad Sci U S A* **108**, 11452-11457, doi:10.1073/pnas.1106083108 (2011).
- 410 15 Glinka, A. *et al.* LGR4 and LGR5 are R-spondin receptors mediating Wnt/beta-catenin  
411 and Wnt/PCP signalling. *EMBO Rep* **12**, 1055-1061, doi:10.1038/embor.2011.175 (2011).
- 412 16 Kazanskaya, O. *et al.* R-Spondin2 is a secreted activator of Wnt/beta-catenin signaling  
413 and is required for *Xenopus* myogenesis. *Dev Cell* **7**, 525-534,  
414 doi:10.1016/j.devcel.2004.07.019 (2004).

- 415 17 Ohkawara, B., Glinka, A. & Niehrs, C. Rspo3 binds syndecan 4 and induces Wnt/PCP  
416 signaling via clathrin-mediated endocytosis to promote morphogenesis. *Dev Cell* **20**,  
417 303-314, doi:10.1016/j.devcel.2011.01.006 (2011).
- 418 18 Lebensohn, A. M. *et al.* Comparative genetic screens in human cells reveal new  
419 regulatory mechanisms in WNT signaling. *Elife* **5**, doi:10.7554/eLife.21459 (2016).
- 420 19 Molday, L. L. & Molday, R. S. 1D4: a versatile epitope tag for the purification and  
421 characterization of expressed membrane and soluble proteins. *Methods Mol Biol* **1177**,  
422 1-15, doi:10.1007/978-1-4939-1034-2\_1 (2014).
- 423 20 Xie, Y. *et al.* Interaction with both ZNRF3 and LGR4 is required for the signalling activity  
424 of R-spondin. *EMBO Rep* **14**, 1120-1126, doi:10.1038/embor.2013.167 (2013).
- 425 21 Nam, J. S., Turcotte, T. J., Smith, P. F., Choi, S. & Yoon, J. K. Mouse cristin/R-spondin  
426 family proteins are novel ligands for the Frizzled 8 and LRP6 receptors and activate beta-  
427 catenin-dependent gene expression. *J Biol Chem* **281**, 13247-13257,  
428 doi:10.1074/jbc.M508324200 (2006).
- 429 22 Park, P. W., Reizes, O. & Bernfield, M. Cell surface heparan sulfate proteoglycans:  
430 selective regulators of ligand-receptor encounters. *J Biol Chem* **275**, 29923-29926,  
431 doi:10.1074/jbc.R000008200 (2000).
- 432 23 Takahashi, I. *et al.* Important role of heparan sulfate in postnatal islet growth and insulin  
433 secretion. *Biochem Biophys Res Commun* **383**, 113-118, doi:10.1016/j.bbrc.2009.03.140  
434 (2009).
- 435 24 Christianson, H. C. & Belting, M. Heparan sulfate proteoglycan as a cell-surface  
436 endocytosis receptor. *Matrix Biol* **35**, 51-55, doi:10.1016/j.matbio.2013.10.004 (2014).

- 437 25 Aricescu, A. R., Lu, W. & Jones, E. Y. A time- and cost-efficient system for high-level  
438 protein production in mammalian cells. *Acta Crystallogr D Biol Crystallogr* **62**, 1243-  
439 1250, doi:10.1107/S0907444906029799 (2006).
- 440 26 Ruffner, H. *et al.* R-Spondin potentiates Wnt/beta-catenin signaling through orphan  
441 receptors LGR4 and LGR5. *PLoS One* **7**, e40976, doi:10.1371/journal.pone.0040976  
442 (2012).
- 443 27 Doench, J. G. *et al.* Optimized sgRNA design to maximize activity and minimize off-target  
444 effects of CRISPR-Cas9. *Nat Biotechnol* **34**, 184-191, doi:10.1038/nbt.3437 (2016).
- 445 28 Wang, T. *et al.* Identification and characterization of essential genes in the human  
446 genome. *Science* **350**, 1096-1101, doi:10.1126/science.aac7041 (2015).
- 447 29 Cong, L. *et al.* Multiplex genome engineering using CRISPR/Cas systems. *Science* **339**,  
448 819-823, doi:10.1126/science.1231143 (2013).
- 449

450 **Acknowledgments**

451 We thank Jan Carette and Rohatgi lab members for input on the project, Henry Ho for pCX-Tev-  
452 Fc, Christian Siebold for pHLsec-HA-Avi-1D4 and Feng Cong for RSPO1-GFP. This work was  
453 funded by NIH grants DP2 GM105448 and R35 GM118082 to R.R. A.M.L. was supported by  
454 the Stanford Dean's Postdoctoral Fellowship, the Stanford Cancer Biology Program Training  
455 Grant and the Novartis sponsored Fellowship from the Helen Hay Whitney Foundation.

456

457 **Author Contributions**

458 A.M.L and R.R. conceived the study, designed experiments and analyzed the data. A.M.L.  
459 conducted all experiments. A.M.L. and R.R. wrote the manuscript.

460

461 **Author Information**

462 The authors declare no conflicting financial interests.

463 Correspondence and requests for materials should be addressed to [rrohatgi@stanford.edu](mailto:rrohatgi@stanford.edu).

**Figure 1**

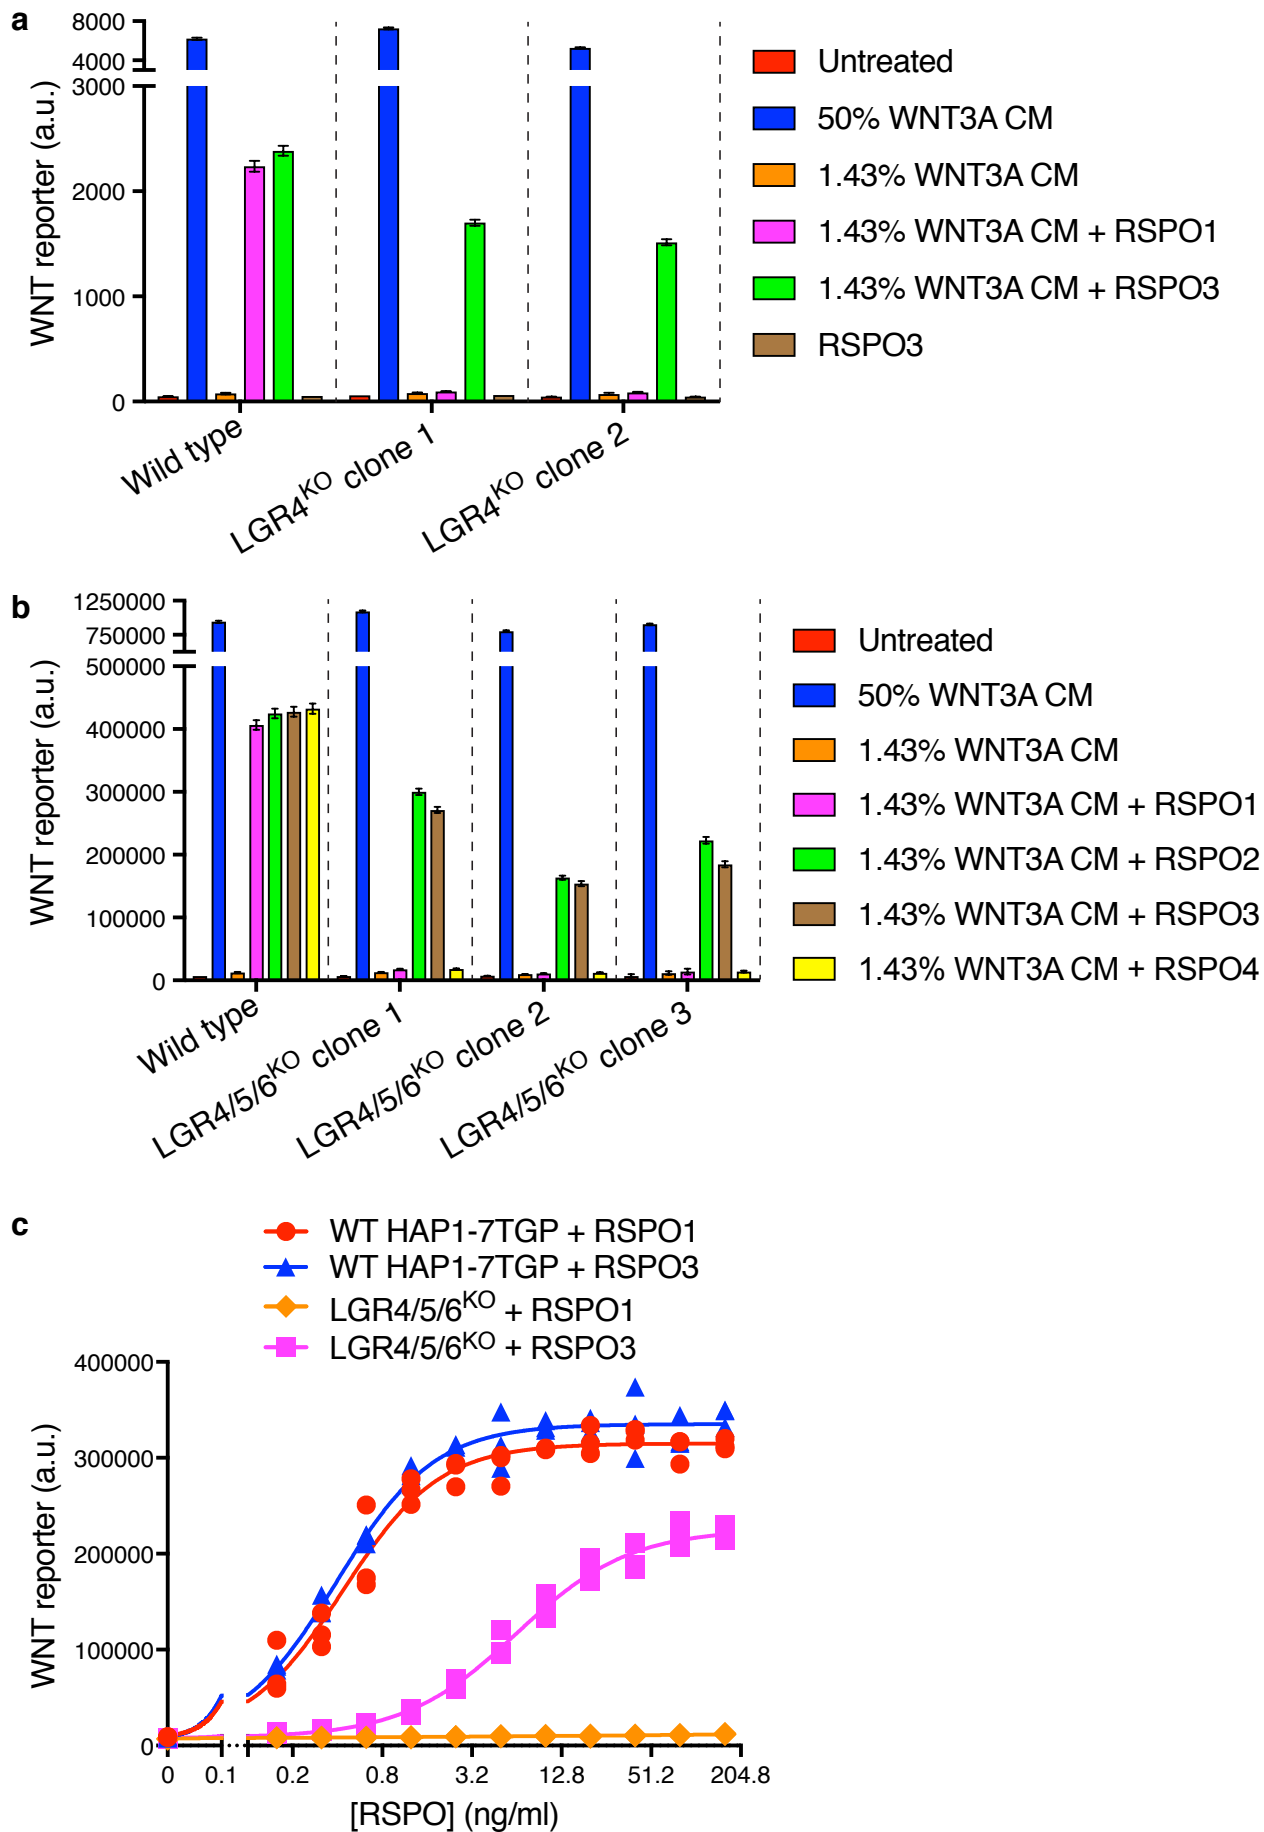



465 Figure 1. RSPO2 and RSPO3 can potentiate WNT signaling in the absence of LGR4, LGR5 and  
466 LGR6.

467 a. WNT reporter fluorescence (median +/- standard error of the median (SEM) from 10,000  
468 cells) for WT HAP1-7TGP and two LGR4<sup>KO</sup> clonal cell lines following treatment with the  
469 indicated combinations of WNT3A conditioned media (CM) and untagged, recombinant RSPO1  
470 or RSPO3 (both at 20 ng/ml). All cell lines responded similarly to a saturating dose of WNT3A,  
471 demonstrating an intact downstream signaling response.

472 b. WNT reporter fluorescence (median +/- SEM from 10,000 cells) for WT HAP1-7TGP and  
473 three LGR4/5/6<sup>KO</sup> clonal cell lines treated with the indicated combinations of WNT3A CM and  
474 various RSPOs. RSPO1, RSPO2 and RSPO3 were used at 40 ng/ml and RSPO4 at 400 ng/ml,  
475 concentrations that produced equivalent responses in WT cells.

476 c. Dose-response curves for RSPO1 and RSPO3 in WT HAP1-7TGP and LGR4/5/6<sup>KO</sup> cells in  
477 the presence of 1.43% WNT3A CM. Each symbol represents the median WNT reporter  
478 fluorescence from 5,000 cells in a single well, and three independently treated wells were  
479 measured for each RSPO concentration. The curves were fitted as described in Methods.

**Figure 2**

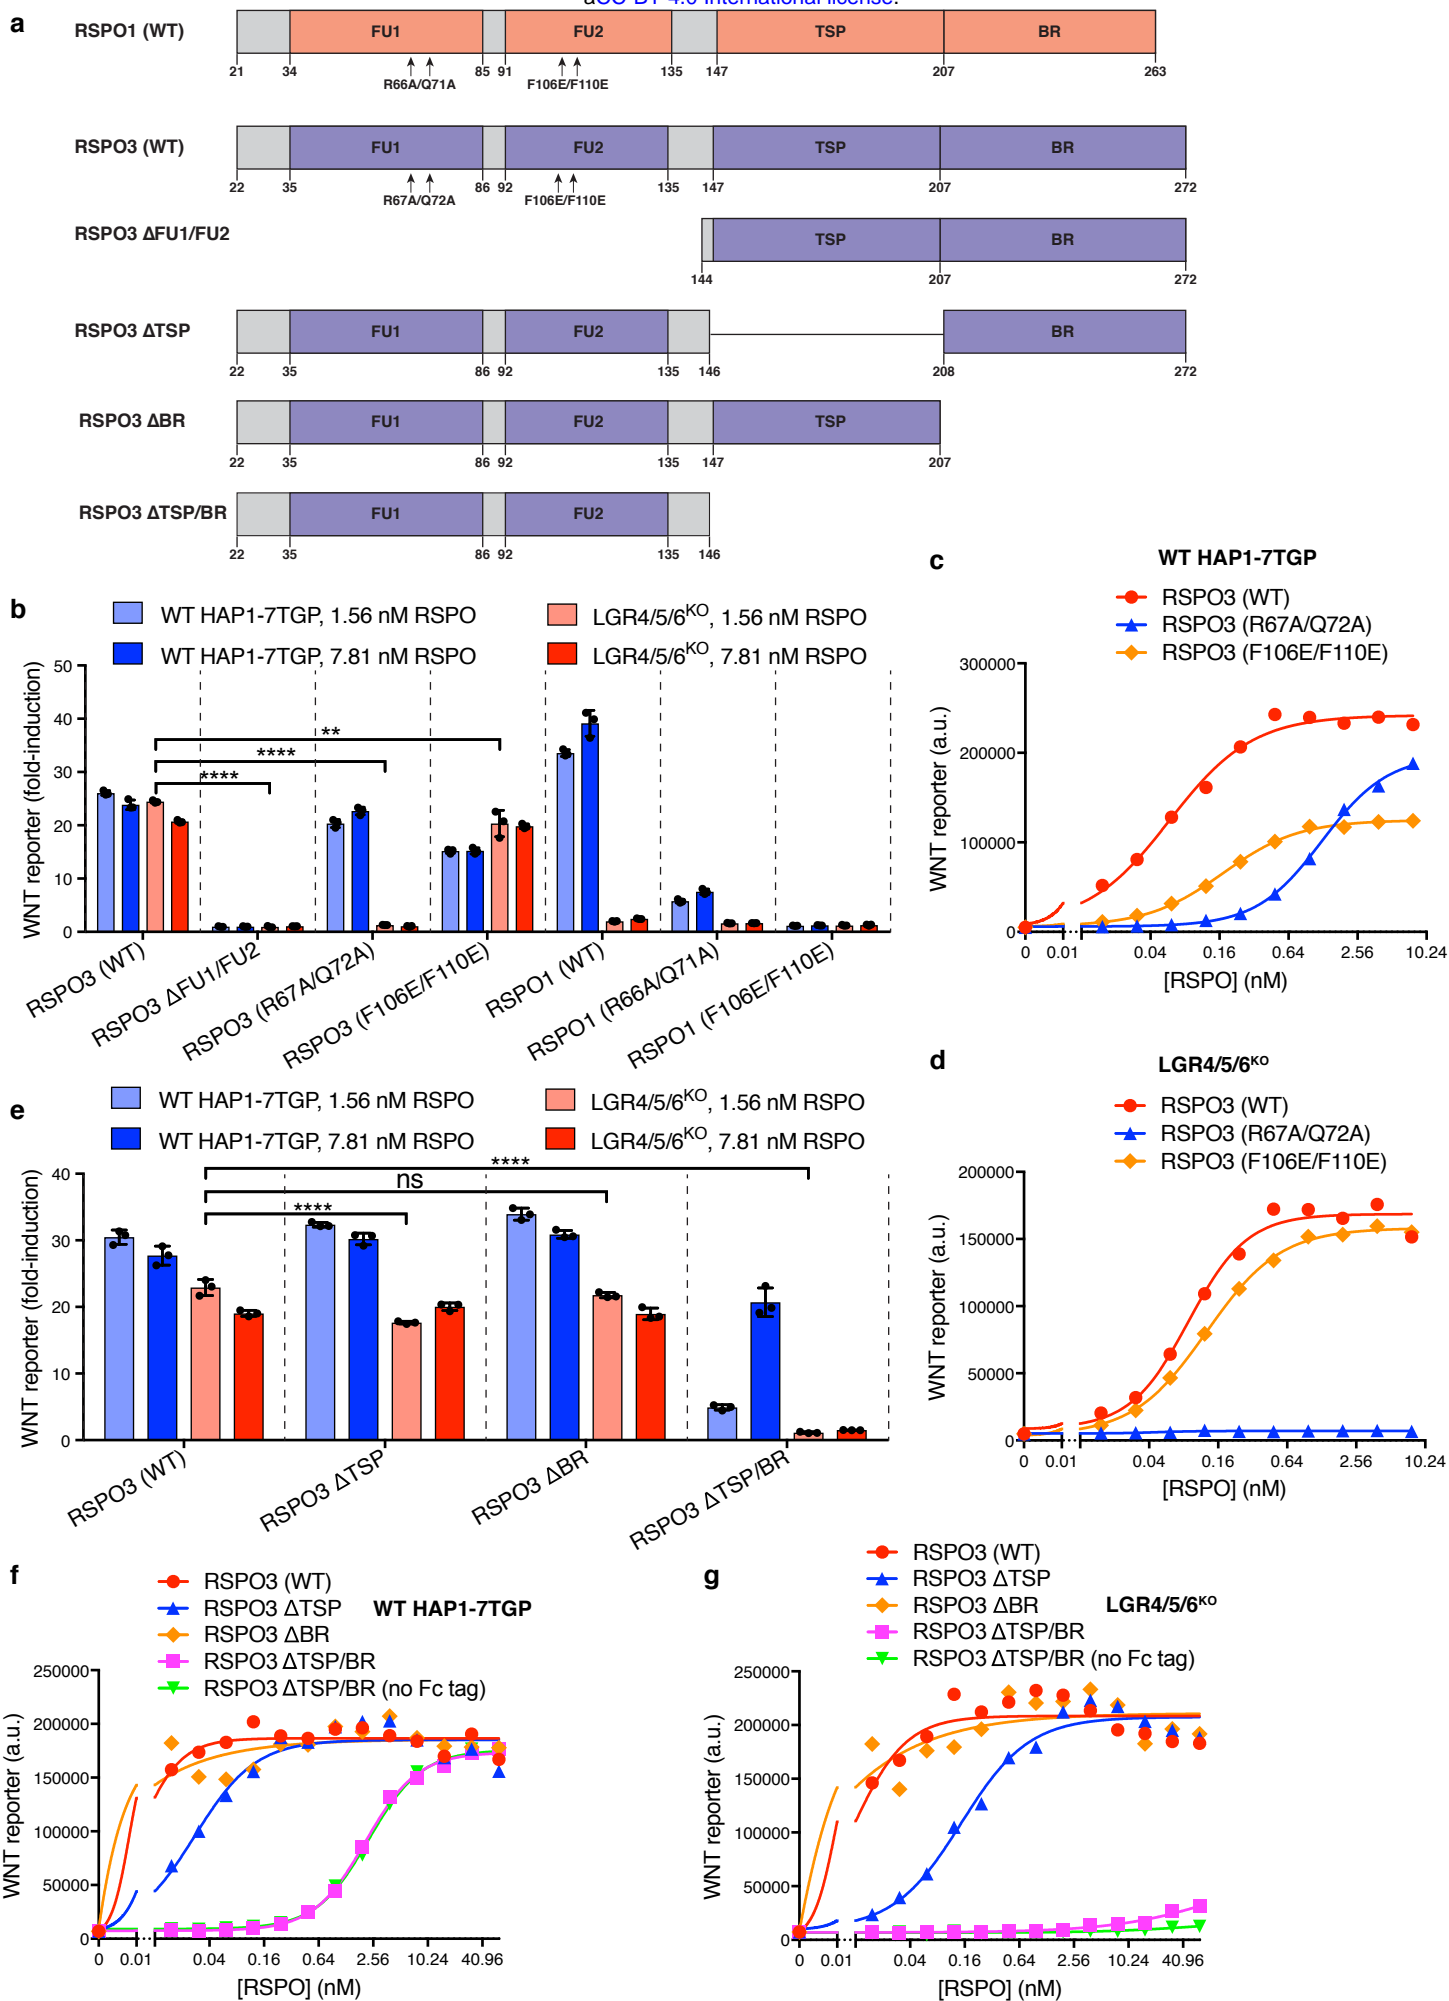

481 Figure 2. Domains of RSPO3 required for LGR-independent signaling.

482 a. Schematic representation of human WT and mutant RSPO1 (pink) and RSPO3 (light blue)

483 proteins produced and purified as described in Methods and Extended Data Figure 1a. The N-

484 terminal HA and the C-terminal Fc and 1D4 tags present in all constructs are not shown. Amino

485 acid numbers for human RSPO1 and RSPO3 (UniProt accession number Q2MKA7 and

486 Q9BXY4, respectively) are indicated below, and arrows show the sites of mutations in the FU1

487 and FU2 domains. Polypeptide lengths are drawn to scale.

488 b and e. Fold-induction in WNT reporter fluorescence over 1.43% WNT3A CM alone (bars and

489 error bars indicate the average  $\pm$  SD from triplicate wells; circles indicate the fold-induction for

490 individual wells) in WT HAP1-7TGP (light blue and blue bars) and LGR4/5/6<sup>KO</sup> (pink and red

491 bars) cells treated with two concentrations of purified RSPO proteins. Significance was

492 determined as described in Methods.

493 c, d, f, g. Dose-response curves for the indicated purified RSPO proteins in WT HAP1-7TGP (c,

494 f) and LGR4/5/6<sup>KO</sup> (d, g) cells in the presence of 1.43% WNT3A CM. Each symbol represents

495 the median WNT reporter fluorescence from 5,000 cells. In f and g, RSPO3  $\Delta$ TSP/BR was tested

496 with and without the dimerizing Fc tag.

**Figure 3**

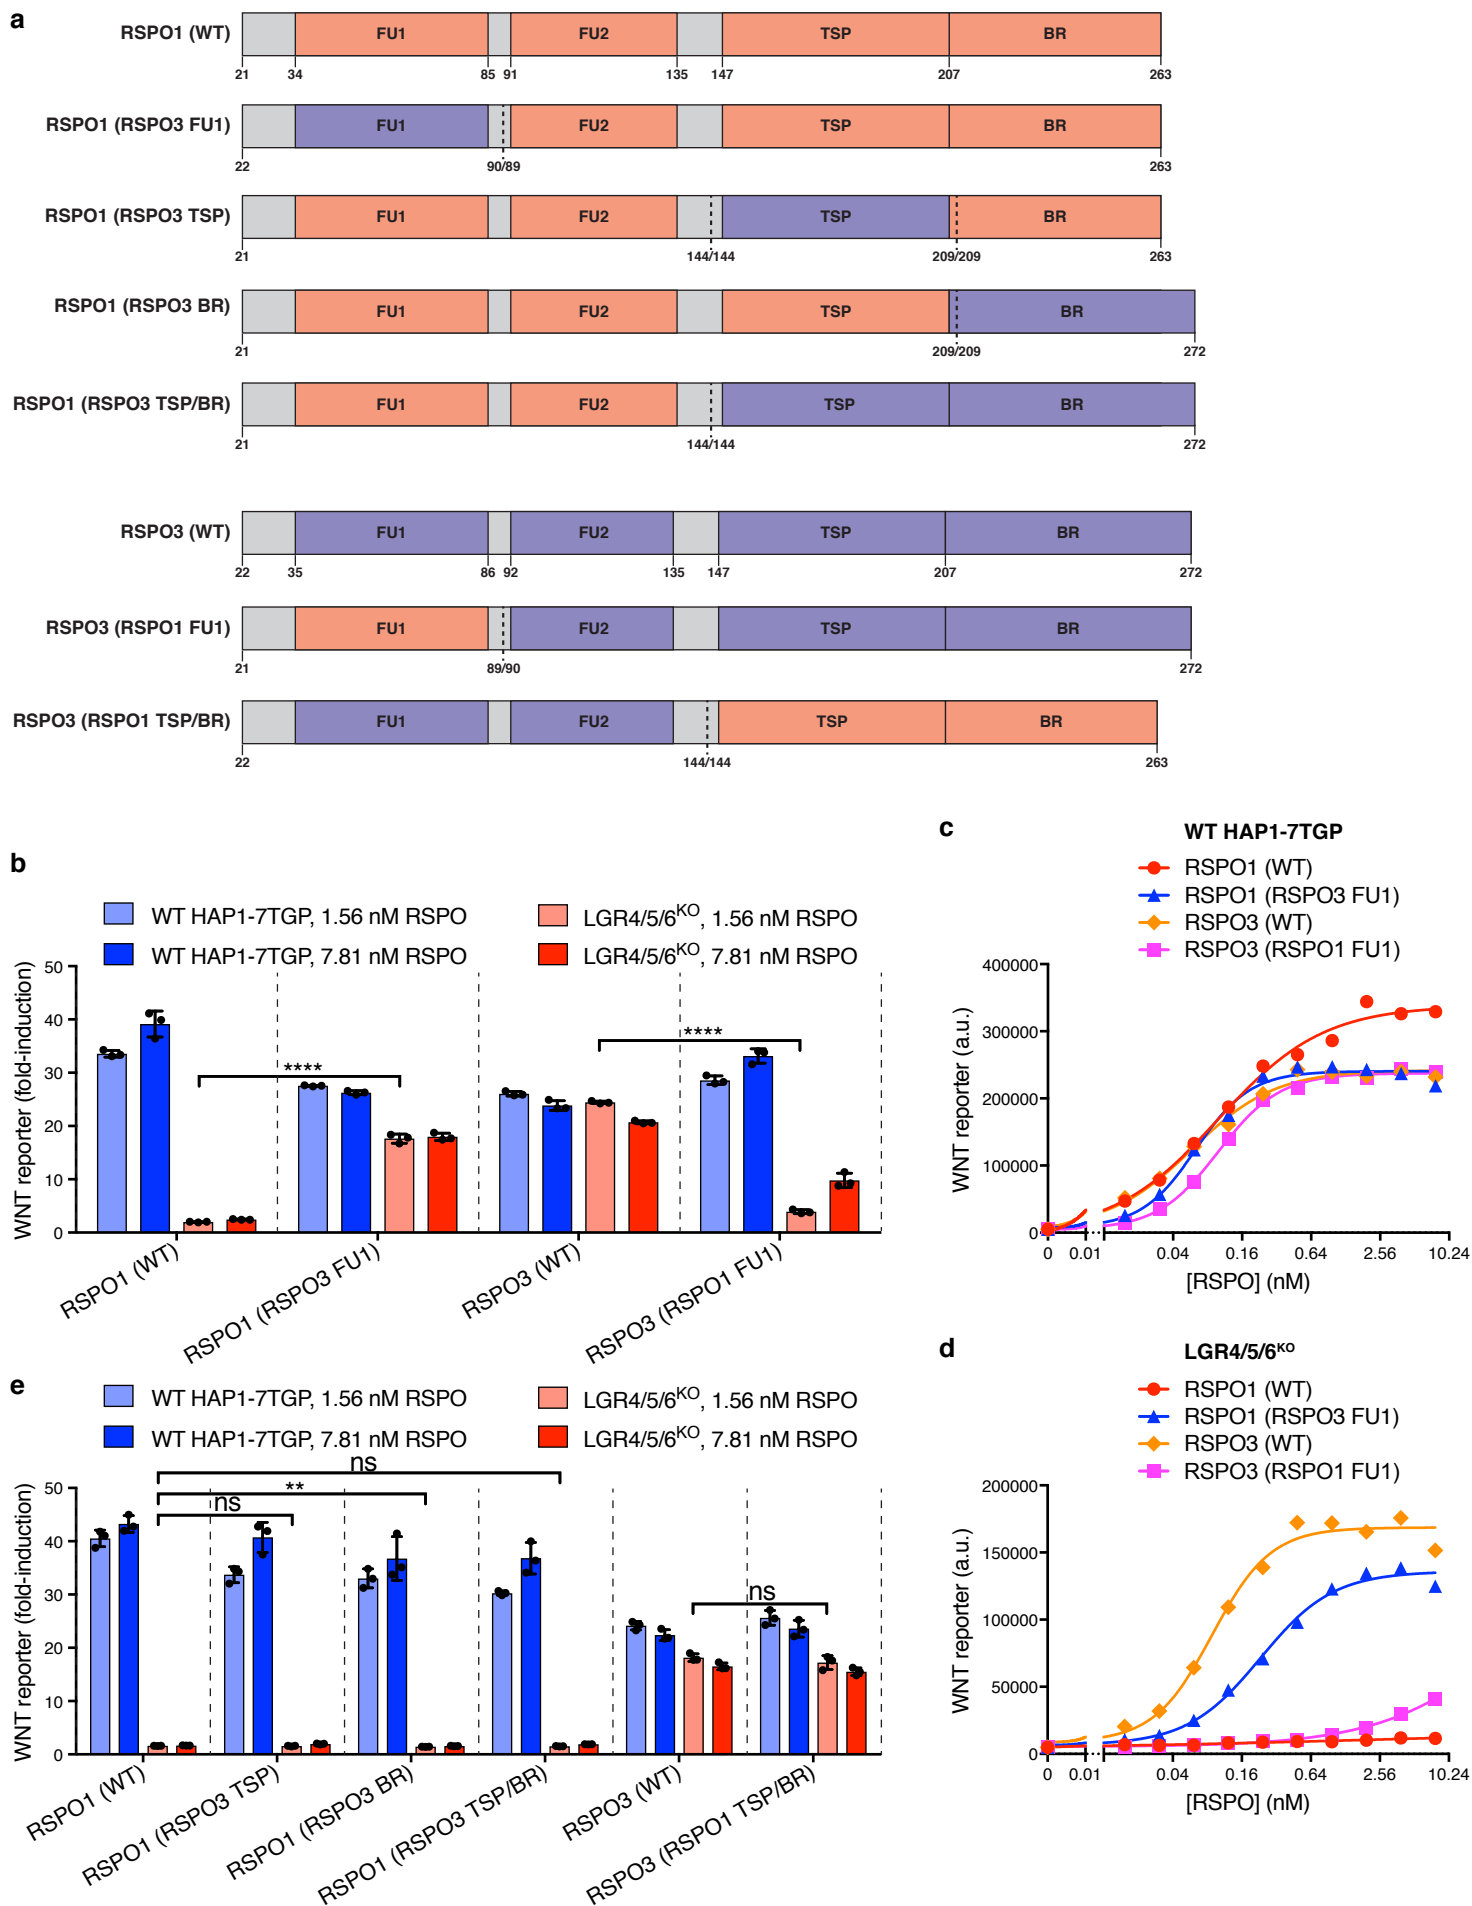

498 Figure 3. The FU1 domain of RSPO3 is sufficient to confer LGR-independent signaling when  
499 transplanted to RSPO1.

500 a. Schematic representation of human WT and chimeric RSPO1 (pink) and RSPO3 (light blue)  
501 proteins, depicted as in Fig. 2a. Vertical dotted lines indicate the sites at which the swaps were  
502 made. Each swap was made at a conserved residue, whose number on the left and right of the  
503 slash corresponds to the protein depicted on the left and right of the dotted line, respectively.

504 b and e. Fold-induction in WNT reporter fluorescence over 1.43% WNT3 CM alone (bars and  
505 error bars indicate the average +/- SD from triplicate wells; circles indicate the fold-induction for  
506 individual wells) in WT HAP1-7TGP (light blue and blue bars) and LGR4/5/6<sup>KO</sup> (pink and red  
507 bars) cells treated with two concentrations of purified RSPO proteins. Significance was  
508 determined as described in Methods.

509 c and d. Dose-response curves for the indicated purified RSPO proteins in WT HAP1-7TGP (c)  
510 and LGR4/5/6<sup>KO</sup> (d) cells in the presence of 1.43% WNT3A CM. Each symbol represents the  
511 median WNT reporter fluorescence from 5,000 cells.

**Figure 4**

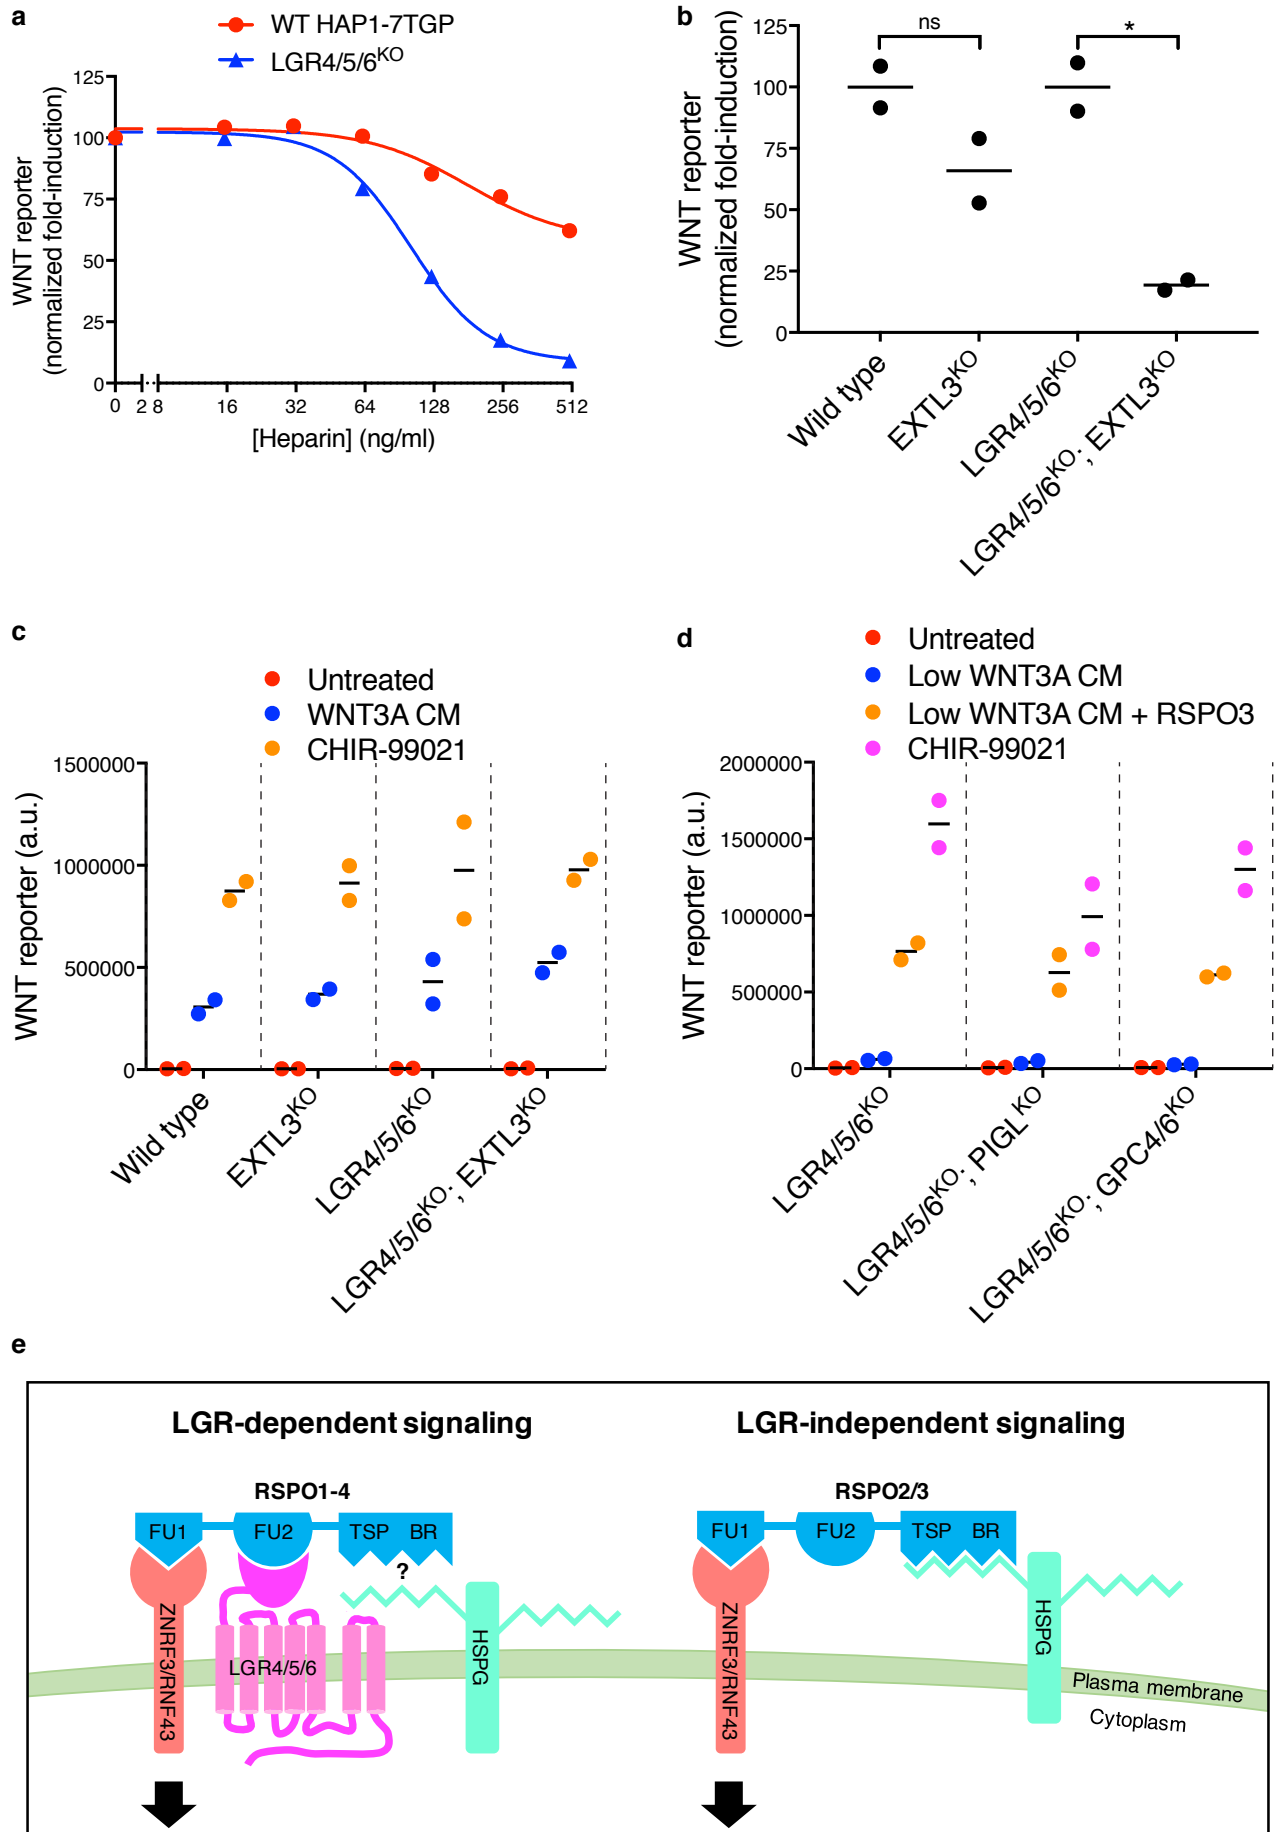

513 Figure 4. LGR-independent signaling by RSPO3 requires heparan sulfate proteoglycans.

514 a. WNT reporter induction (calculated from the median WNT reporter fluorescence from 5,000

515 cells) in WT HAP1-7TGP and LGR4/5/6<sup>KO</sup> cells stimulated with 1.43% WNT3A CM, 2 nM

516 untagged RSPO3 and the indicated concentrations of heparin. The fold-induction over 1.43%

517 WNT3A CM alone in the absence of heparin was normalized to 100%.

518 b. WNT reporter induction (calculated from the average WNT reporter fluorescence of triplicate

519 wells) in the indicated cell lines following treatment with 2.78% WNT3A CM and 20 ng/ml

520 untagged RSPO3. The fold-induction was normalized to the average fold-induction for WT (left

521 two genotypes) or for LGR4/5/6<sup>KO</sup> (right two genotypes) cells. Each circle represents a unique

522 clonal cell line (determined by genotyping, Supplementary Data File 1) and the average of data

523 from two independent clonal cell lines for each genotype is indicated by a horizontal line.

524 Significance was determined as described in Methods.

525 c. WNT reporter fluorescence (average +/- SD from triplicate wells) for the same clonal cell lines

526 depicted in b. Where indicated, cells were treated with a sub-saturating concentration (11.1%) of

527 WNT3A CM or with 10  $\mu$ M of the GSK3 inhibitor CHIR-99021.

528 d. WNT reporter fluorescence (average +/- SD from duplicate wells) following treatment with a

529 low concentration of WNT3A CM (2.78% for LGR4/5/6<sup>KO</sup> cells, or 11.1% for LGR4/5/6<sup>KO</sup>;

530 PIGL<sup>KO</sup> and LGR4/5/6<sup>KO</sup>; GPC4/6<sup>KO</sup> cells) alone or in combination with 20 ng/ml RSPO3, or

531 with 10  $\mu$ M of the GSK3 inhibitor CHIR-99021. Since depletion of PIGL or of GPC4 and GPC6

532 reduces signaling at low WNT concentrations<sup>18</sup>, different WNT3A CM concentrations were used

533 to achieve comparable signaling responses to WNT3A alone in all cell lines so that potentiation

534 by the further addition of RSPO3 could be directly compared. Each circle represents a unique

535 clonal cell line, and the average of data from two independent clonal cell lines for each genotype  
536 is indicated by a horizontal line.  
537 e. Proposed models for LGR-dependent and LGR-independent signaling by RSPOs. See text for  
538 details.



**Extended Data Figure 1**

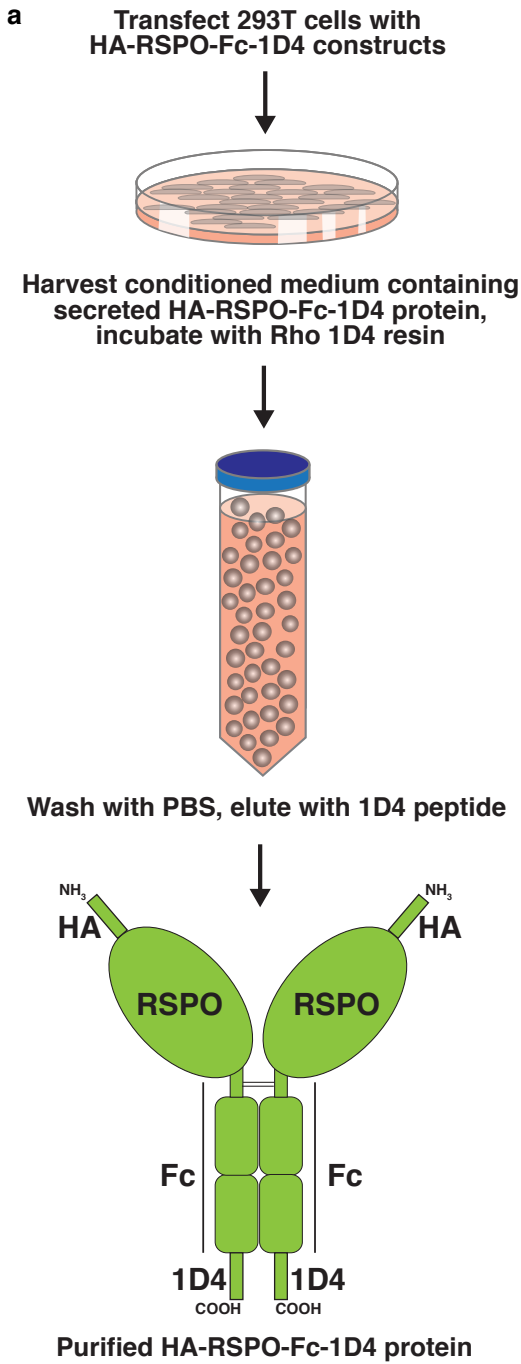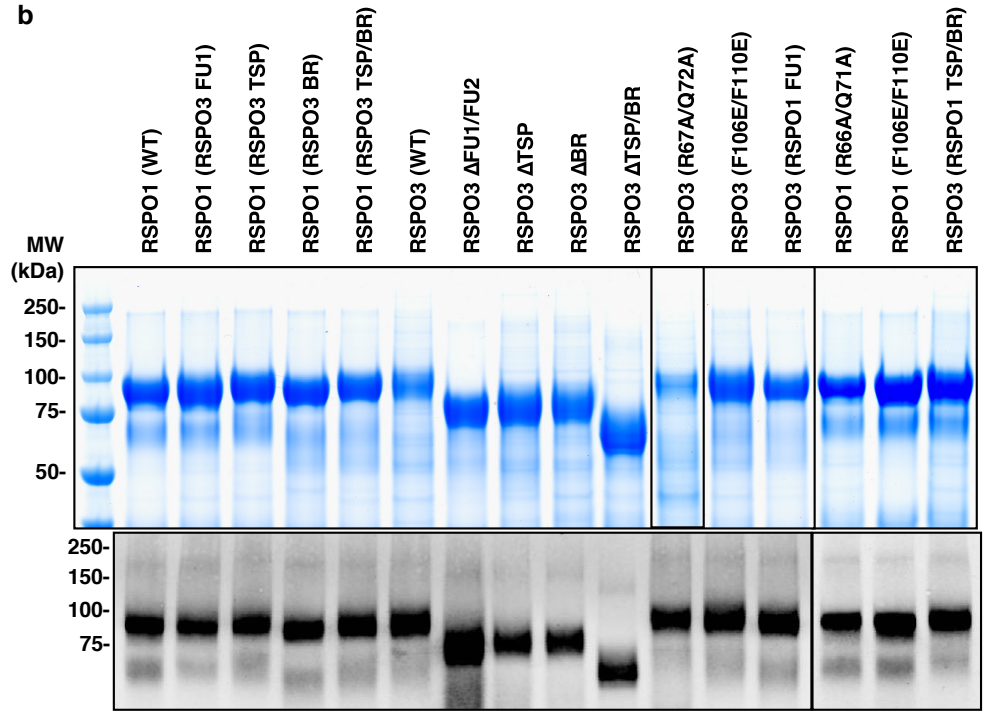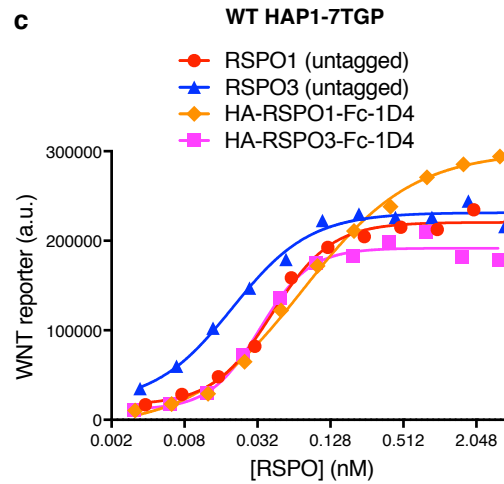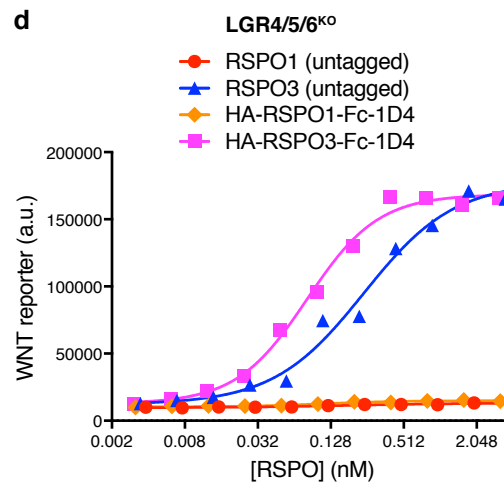

540 Extended Data Figure 1. Affinity purification and functional characterization of recombinant  
541 RSPO proteins used in this study.

542 a. Summary of a new experimental strategy for the rapid, one-step purification of secreted WT  
543 and mutant RSPO proteins containing an HA epitope tag at the N-terminus and a dual Fc-1D4  
544 tag at the C-terminus. The Fc fusion stabilized the various RSPO mutants used in the study, the  
545 1D4 tag enabled immunoaffinity purification under native conditions, and the HA tag allowed  
546 quantitative immunoblotting to determine relative ligand concentrations and ensure that each  
547 RSPO ligand was produced as a full-length species. See Methods for details.

548 b. Equal volumes (13.5  $\mu$ l each) of the final eluate for each purified RSPO protein were resolved  
549 by polyacrylamide gel electrophoresis (PAGE) and stained with coomassie (top panel). Proteins  
550 were quantified by fluorimetry using the Licor Odyssey scanner and then equal mass amounts of  
551 each protein were analyzed by immunoblotting against the HA tag (bottom panels).

552 c and d. Dose-response curves comparing untagged RSPOs to RSPOs tagged with HA and Fc-  
553 1D4 tags (shown in b) in WT HAP1-7TGP (c) and LGR4/5/6<sup>KO</sup> (d) cells in the presence of  
554 1.43% WNT3A CM. Each symbol represents the median WNT reporter fluorescence from 5,000  
555 cells.

556 Extended Data Table 1. Relative gene expression level in HAP1 cells of selected genes discussed  
557 in this work.

| Gene         | RPKM        |             |         |
|--------------|-------------|-------------|---------|
|              | Replicate 1 | Replicate 2 | Average |
| <i>LGR4</i>  | 160.61      | 174.69      | 167.65  |
| <i>LGR5</i>  | 0.02        | 0.00        | 0.01    |
| <i>LGR6</i>  | 0.02        | 0.00        | 0.01    |
| <i>ZNRF3</i> | 30.9        | 33.3        | 32.1    |
| <i>RNF43</i> | 0.12        | 0.08        | 0.1     |
| <i>GPC1</i>  | 49.55       | 47.53       | 48.54   |
| <i>GPC2</i>  | 4.17        | 4.79        | 4.48    |
| <i>GPC3</i>  | 170.22      | 144.37      | 157.29  |
| <i>GPC4</i>  | 209.39      | 229.86      | 219.63  |
| <i>GPC5</i>  | 0.1         | 0.1         | 0.1     |
| <i>GPC6</i>  | 13.88       | 14.90       | 14.39   |
| <i>SDC1</i>  | 51.37       | 47.88       | 49.63   |
| <i>SDC2</i>  | 11.42       | 9.2         | 10.31   |
| <i>SDC3</i>  | 43.58       | 50.64       | 47.11   |
| <i>SDC4</i>  | 8.16        | 8.21        | 8.18    |

558

559 RPKM (Reads Per Kilobase of transcript per Million mapped reads) values from duplicate  
560 RNAseq datasets generated as described previously<sup>18</sup> from two different passages of WT HAP1  
561 cells are shown. Groups of paralogues or genes with redundant function are shaded in alternating  
562 colors to facilitate comparisons.

## 563 **Supplementary Information**

564

565 Supplementary Data File 1. List of clonal cell lines used in this study.

566           Clonal cell lines in which a single or multiple genes were targeted using CRISPR/Cas9  
567 are described in two separate spreadsheets labeled accordingly. For cell lines engineered using  
568 CRISPR/Cas9, when more than one clone was generated using the same CRISPR guide, the  
569 “Clone Name” column indicates the generic name used throughout the manuscript to describe  
570 the genotype, and the “Clone #” column identifies the specific allele in each individual clone.  
571 The figures in which each clone was used are also indicated. The “CRISPR guide” column  
572 indicates the name of the guide used, which is the same as that of the oligos encoding sgRNAs  
573 (see Methods and Supplementary Data File 3). The “Genomic Sequence” column shows 80 bases  
574 of genomic sequence (5’ relative to the gene is to the left) surrounding the target site. For each  
575 group of clones made using the same CRISPR guide (separated by gray spacers), the “Genomic  
576 Sequence” column is headlined by the reference WT genomic sequence (obtained from RefSeq),  
577 with the guide sequence colored blue. The site of the double strand cut made by Cas9 is between  
578 the two underlined bases. Sequencing results for individual clones are indicated below the  
579 reference sequence. Some WT clones are indicated as such and were used as controls. For  
580 mutant clones, mutated bases are colored red (dashes represent deleted bases, three dots are used  
581 to indicate that a deletion continues beyond the 80 bases of sequence shown, and large insertions  
582 are indicated in brackets), and the nature of the mutation, the resulting genotype and any  
583 pertinent observations are also described. For clones in which multiple genes were targeted, the  
584 CRISPR guide or pair of guides used (in some cases two different guides were used  
585 simultaneously to target adjacent sites in the same gene), genomic sequence, mutation, genotype

586 and observations pertaining to each of the targeted genes are designated “1”, “2”, “3” and so on  
587 in the column headings, and are shown under spacers of different colors, respectively.

588

589 Supplementary Data File 2. Nucleotide sequences of RSPO1 and RSPO3 WT, mutant and  
590 chimeric constructs used in this study.

591 Lowercase sequences overlap the vector sequence upstream of the unique AgeI site and  
592 downstream of the unique KpnI site in the pHLsec-HA-Tev-Fc-Avi-1D4 vector. Uppercase  
593 sequences encode RSPO1 or RSPO3. For point mutants, mutated codons relative to WT are  
594 underlined.

595

596 Supplementary Data File 3. List of oligonucleotides and primers used for generation and  
597 characterization of clonal cell lines engineered using CRISPR/Cas9.

598 The names and sequences of pairs of oligonucleotides encoding sgRNAs (which were  
599 cloned into pX330) are shown in the first and second columns, respectively. The names and  
600 sequences of pairs of primers used to amplify corresponding genomic regions flanking sgRNA  
601 target sites are shown in the third and fourth columns, respectively. The names and sequences of  
602 single primers used for sequencing of the amplified target sites are shown in the fifth and sixth  
603 columns, respectively.
